# Supplementary material for: Pyridinic nitrogen-rich carbon nanocapsules from a bioinspired polydopamine derivative for highly efficient electrocatalytic oxygen reduction
Source: Royal Society of Chemistry journal article supplement (doi:10.1039/c6ta09315a), 2016-11-29
Supplement: c6ta09315a1.pdf [file c6ta09315a1.pdf]

## Electronic Supplementary Information

### **Pyridinic nitrogen-rich carbon nanocapsules from a bioinspired polydopamine derivative for highly efficient electrocatalytic oxygen reduction**

*Zhengran Yi,<sup>a§</sup> Zheyang Zhang,<sup>a§</sup> Shuai Wang,<sup>\*a</sup> and Gaoquan Shi<sup>\*b</sup>*

<sup>a</sup>School of Chemistry and Chemical Engineering, Huazhong University of Science and Technology, Wuhan 430074, PR China.

\*E-mail: [chmsamuel@mail.hust.edu.cn](mailto:chmsamuel@mail.hust.edu.cn)

<sup>b</sup>Department of Chemistry, Tsinghua University, Beijing 100084, PR China.

\*E-mail: [gshi@tsinghua.edu.cn](mailto:gshi@tsinghua.edu.cn)

<sup>§</sup>These authors contributed equally to this work.

## 1. Experimental Section

*Synthesis of 2-Bromo-6-iodo-3-[(4-methoxyphenyl)methoxy]pyridine (compound 2):* 2-Bromo-3-hydroxy-6-iodopyridine (compound 1) was synthesized according to the literature.<sup>[S1]</sup> Compound 1 (60 g, 200.07 mmol) was dissolved in DMF (700 mL), and then K<sub>2</sub>CO<sub>3</sub> (55.3 g, 400.14 mmol) and 1-(chloromethyl)-4-methoxybenzene (34.5 g, 220.08 mmol) were added. This mixture was stirred at 90 °C for 18 h, and followed by the addition of H<sub>2</sub>O to quench the reaction. A solid formed during the process and was collected by filtration and dried in vacuo to afford a light brown solid (45 g, 99.7 %). <sup>1</sup>H NMR (400 MHz, CDCl<sub>3</sub>, δ ppm): 7.54 (d, 1H), 7.35 (d, 2H), 6.93 (d, 2H), 6.86 (d, 1H), 5.09 (s, 2H), 3.82 (s, 3H). <sup>13</sup>C NMR (100 MHz, CDCl<sub>3</sub>, δ): 159.79, 152.52, 134.08, 129.42, 128.89, 127.01, 122.67, 114.22, 101.82, 71.16, 55.32. HRMS (ESI) m/z: [M]<sup>+</sup> Calcd. for C<sub>13</sub>H<sub>11</sub>BrINO<sub>2</sub> 418.90; Found 418.38.

*Synthesis of 6-Iodo-2-methoxy-3-[(4-methoxyphenyl)methoxy]pyridine (compound 3):* To a solution of compound 2 (45 g, 200.07 mmol) in DMF (500 mL) was added CH<sub>3</sub>ONa (8.7 g, 160.70 mmol). The mixture was stirred at 100 °C for 2 h, and followed by the addition of H<sub>2</sub>O to quench the reaction. The crude product was filtered off and subsequently purified by column chromatography on silica gel to afford a white solid (32 g, 80 %). <sup>1</sup>H NMR (400 MHz, CDCl<sub>3</sub>, δ ppm): 7.32 (d, 2H), 7.16 (d, 1H), 6.91 (d, 2H), 6.74 (d, 1H), 5.03 (s, 2H), 3.95 (s, 3H), 3.81 (s, 3H). <sup>13</sup>C NMR (100 MHz, CDCl<sub>3</sub>, δ): 159.66, 154.55, 143.22, 129.15, 127.89, 127.17, 122.28, 114.12, 100.19, 70.85, 55.31, 53.87. HRMS (ESI) m/z: [M+Na]<sup>+</sup> Calcd. for C<sub>14</sub>H<sub>14</sub>INNaO<sub>3</sub> 393.99; Found 393.99.

*Synthesis of 6-methoxy-5-[(4-methoxyphenyl)methoxy]-2-pyridineacetonitrile (compound 4):* To a solution of compound 3 (32 g, 86.21 mmol) in DMF (500 mL) were added  $\text{Pd}_2(\text{dba})_3$  (1.6 g, 1.72 mmol),  $\text{P}(\text{t-Bu})_3$  (880 mg, 4.31 mmol), trimethylsilyl acetonitrile (19.5 g, 172.43 mmol) and zinc fluoride (8.9 g, 86.21 mmol). This mixture was stirred at 150 °C for 7 h. After cooling to ambient temperature, the reaction solution was poured into  $\text{H}_2\text{O}$  and extracted with ethyl acetate. The combined organic phase was dried over  $\text{MgSO}_4$ , filtered, concentrated, and finally purified by column chromatography on silica gel to afford a yellow solid (21 g, 86 %).  $^1\text{H}$  NMR (400 MHz,  $\text{CDCl}_3$ ,  $\delta$  ppm): 7.34 (d, 2H), 7.03 (d, 1H), 6.91 (d, 2H), 6.84 (d, 1H), 5.07 (s, 2H), 4.00 (s, 3H), 3.81 (s, 3H), 3.74 (s, 2H).  $^{13}\text{C}$  NMR (100 MHz,  $\text{CDCl}_3$ ,  $\delta$ ): 159.63, 142.60, 137.80, 129.14, 128.06, 120.37, 117.49, 114.76, 114.11, 70.74, 55.31, 53.87, 25.42. HRMS (ESI)  $m/z$ :  $[\text{M}]^+$  Calcd. for  $\text{C}_{16}\text{H}_{16}\text{N}_2\text{O}_3$  284.12; Found 284.22.

*Synthesis of 6-methoxy-5-[(4-methoxyphenyl)methoxy]-2-pyridine ethanamine (compound 5):* To a solution of compound 4 (21 g, 73.86 mmol) in MeOH (200 mL) was added Raney Ni (1.0 g, 7.39 mmol) and concentrated HCl (60 mL, 738.6 mmol) and the system was stirred under an atmosphere of hydrogen via a balloon for 2 h. The reaction products were filtered through a pad of celite and washed through with MeOH. The filtrate was basified to a pH value of 9 using saturated aqueous sodium carbonate. Methanol was removed under vacuo and the resulting residue was partitioned with water and a mixture of chloroform and ethanol (4:1). The organic phase was dried over  $\text{MgSO}_4$ , filtered, concentrated to afford a white solid (21 g, 86 %).  $^1\text{H}$  NMR (400 MHz,  $\text{CDCl}_3$ ,  $\delta$  ppm): 7.24 (d, 2H), 7.03 (d, 1H), 6.81 (d, 2H), 6.58 (d, 1H), 4.78 (s, 2H), 3.84

(s, 3H), 3.67 (s, 3H), 3.28 (m, 2H), 2.66 (m, 2H).  $^{13}\text{C}$  NMR (100 MHz,  $\text{CDCl}_3$ ,  $\delta$ ): 159.67, 154.30, 147.41, 141.25, 129.13, 128.76, 121.18, 115.36, 113.46, 70.44, 54.29, 52.23, 39.94, 36.25. HRMS (ESI)  $m/z$ : HRMS (ESI)  $m/z$ :  $[\text{M}+\text{Na}]^+$  Calcd. for  $\text{C}_{14}\text{H}_{14}\text{INNaO}_3$  311.15; Found 311.13.

*Synthesis of 6-(2-aminoethyl)-3-hydroxy-pyridin-2(1H)-one (AHPO) hydrobromide (compound 6)*: Compound 5 was added to a solution of hydrobromic acid (40 %) in acetic acid at room temperature, the suspension was then heated to 80 °C, and stirred for 12 h, the acid was removed under vacuum to give a crude product. The crude product was stirred with DCM (50 mL) for 2 h, filtered and washed with DCM (30 mL), and dried to afford a light green solid (13 g, 76 %).  $^1\text{H}$  NMR (400 MHz,  $\text{CDCl}_3$ ,  $\delta$  ppm): 7.35 (dd, 1H), 6.81 (dd, 1H), 3.31 (m, 2H), 3.10 (m, 2H).  $^{13}\text{C}$  NMR (100 MHz,  $\text{CDCl}_3$ ,  $\delta$ ): 155.62, 143.43, 134.92, 125.53, 114.87, 38.42, 29.40. HRMS (ESI)  $m/z$ :  $[\text{M}]^+$  Calcd. for  $\text{C}_7\text{H}_{11}\text{N}_2\text{O}_2$  115.08; Found 115.07.

*Poly-AHPO (PAHPO) coating*: AHPO hydrobromide (3 mg/mL) was dissolved in 15 mM Tris under stirring, and substrates containing metal nickel foil, polyurethane sponge and silica nanospheres were dipped into the solution. pH-induced oxidation changes the solution color from yellow to black.

*Preparation of PAHPO-derived N-doped carbon nanocapsules (PAP-NCNCs)*: Silica nanospheres were synthesized as templates by Stöber method.<sup>[S2]</sup> First, silica nanospheres (500 mg) were mixed with the synthesized AHPO hydrobromide (150 mg) in Tris-buffer (50 mL, 15 mM) for 60 h. The poly-AHPO (PAHPO)/silica nanocomposite obtained was collected by centrifugation, then carbonized under  $\text{N}_2$

atmosphere at 900 °C for 1 h with a heating rate of 10 °C min<sup>-1</sup>. After washing in 5 M NaOH aqueous solution for 4 h and subsequent freeze-drying, PAP-derived NCNCs were finally obtained. Polydopamine-derived NCNCs (PDA-NCNCs) were prepared under a similar procedure with dopamine as precursor.

*Characterizations:* The structures and morphology of the samples were characterized by NMR spectra (Bruker AVANCE III-400 spectrometer), mass spectra (Ion Spec 4.7 T FTMS instrument), field-emission scanning electron microscope (SEM, FEI, Nova NanoSEM 450) and field-emission transmission electron microscope (TEM, FEI, Tecnai G2 F30). The electron energy loss spectroscopy (EELS) spectra and mappings were performed on the field-emission TEM. X-ray photoelectron spectroscopy (XPS) measurements were taken on a VG ESCALAB 250 spectrometer with an Al K $\alpha$  X-ray source (1486 eV), X-ray radiation (15 kV and 10 mA), and hemispherical electron energy analyzer. Raman spectra were recorded on a confocal laser micro-Raman spectrometer (Thermo Fischer DXR, USA) equipped with a He-Ne laser of excitation of 532 nm.

*Electrocatalytic performance measurements:* All of the electrochemical measurements were performed in a conventional three-electrode cell using a rotating ring disk electrode rotator (RRDE-3A, Japan) and a CHI 760E electrochemical analyzer (CH Instruments, Inc., Shanghai). Hg/HgO (0.1 M NaOH) electrode and platinum mesh were used as reference and counter electrodes, respectively. All potentials measured were calibrated to reversible hydrogen electrode (RHE) using the following equation:  $E(\text{RHE}) = E(\text{Hg/HgO}) + 0.165 \text{ V} + 0.0591 \times \text{pH}$ . A rotating disk electrode (RDE) with

a glassy carbon disk (5 mm diameter) and a rotating ring-disk electrode (RRDE) electrode with a Pt ring (5 mm inner diameter and 7 mm outer diameter) served as the substrate for the working electrodes for evaluating the oxygen reduction reaction (ORR) activities. To prepare the working electrodes, 5 mg catalysts were dispersed in an aqueous solution containing 10  $\mu\text{L}$  Nafion solution (5 wt%) and 1 mL ethanol in an ultrasonic bath. The obtained homogeneous catalyst ink (8  $\mu\text{L}$ ) was then dropped onto a mirror-polished glassy carbon electrode. A 0.1 M KOH aqueous solution saturated with  $\text{O}_2$  was used as the electrolyte unless otherwise stated. All linear scan voltammogram (LSV) measurements were conducted at a scan rate of 5  $\text{mV s}^{-1}$  at room temperature.

On the basis of RDE data, the kinetic parameters can be analyzed with the Koutecky-Levich equation using the following relationship:

$$1/j_d = 1/j_k + 1/B\omega^{1/2}$$

where  $j_k$  is the kinetic current density at a constant potential,  $j_d$  is the measured current density,  $\omega$  is the electrode rotating speed in rpm, and the theoretical value of the Levich slope ( $B$ ) is evaluated from the following equation:

$$B = 0.2nF\nu^{-1/6}C_{\text{O}_2}D_{\text{O}_2}^{2/3}$$

where  $n$  is the overall number of transferred electrons in the ORR process,  $F$  is the Faradaic constant (96485  $\text{C mol}^{-1}$ ),  $C_{\text{O}_2}$  is the bulk concentration (solubility) of  $\text{O}_2$  in 0.1 M KOH ( $1.2 \times 10^{-6} \text{ mol cm}^{-3}$ ),  $D_{\text{O}_2}$  is the diffusion coefficient of  $\text{O}_2$  in 0.1 M KOH ( $1.9 \times 10^{-5} \text{ cm}^2 \text{ s}^{-1}$ ) and  $\nu$  is the kinematic viscosity of 0.1 M KOH ( $0.01 \text{ cm}^2 \text{ s}^{-1}$ ). The constant 0.2 is adopted when the rotating speed is in rpm.

On the basis of RRDE measurements, the electron transfer number ( $n$ ) and  $\text{HO}_2^-$  intermediate production percentage ( $\% \text{HO}_2^-$ , which serves as  $2\text{e}^-$  pathway selectivity) were determined as follows:

$$n = \frac{4I_d}{I_d + I_r/N}$$

$$\% \text{HO}_2^- = \frac{200I_r/N}{I_d + I_r/N}$$

where  $I_d$  is the disk current,  $I_r$  is the ring current, and  $N = 0.37$  is the current collection efficiency of the Pt ring.

Zn–air batteries were tested in home-made electrochemical batteries,<sup>[S3]</sup> where catalysts loaded on the carbon paper as the air cathode and Zn foil as anode in 6.0 M KOH. Catalyst loading was  $0.5 \text{ mg cm}^{-2}$  for all materials.

## 2. Supplementary NMR spectra

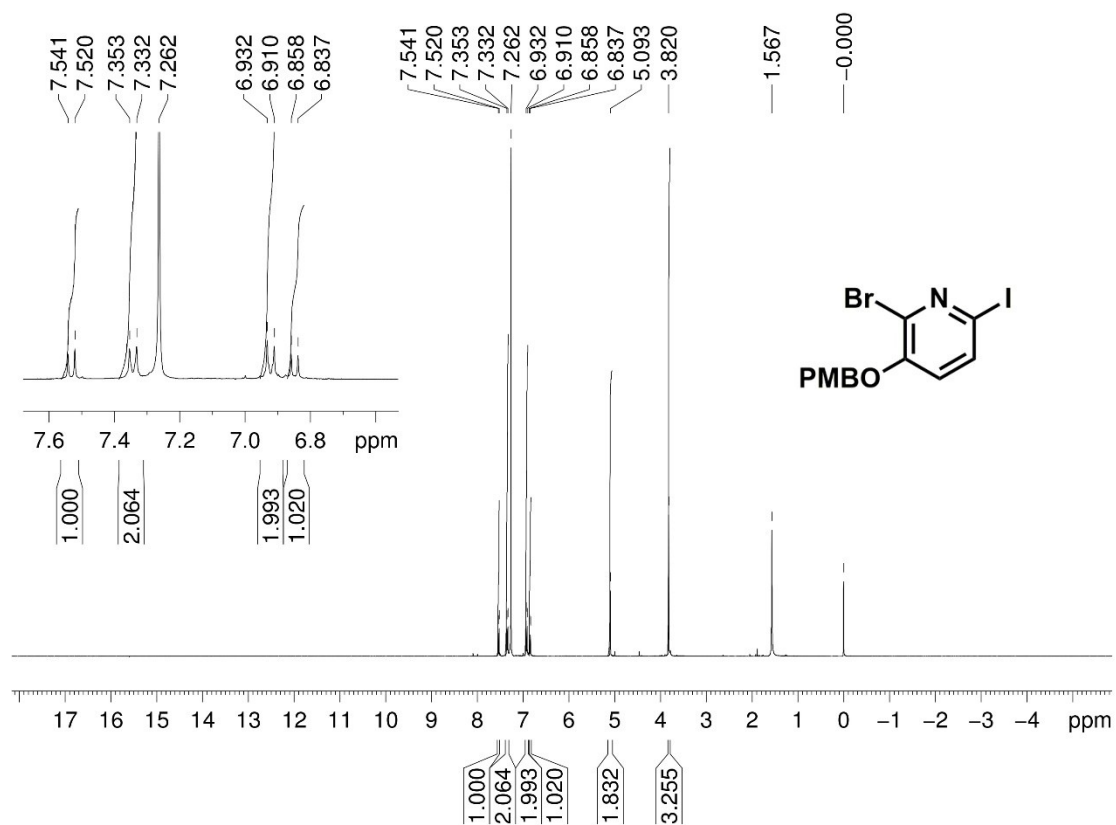

<sup>1</sup>H NMR spectrum of compound 2 in CDCl<sub>3</sub>



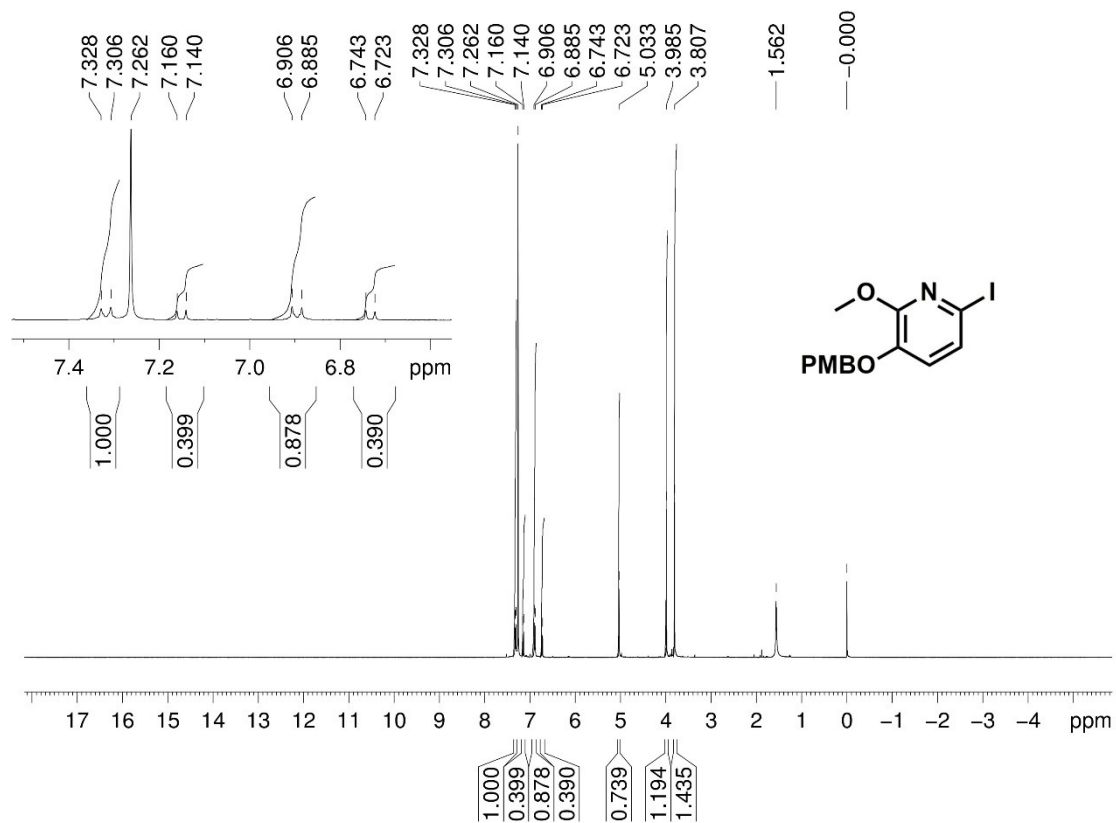

<sup>1</sup>H NMR spectrum of compound 3 in CDCl<sub>3</sub>

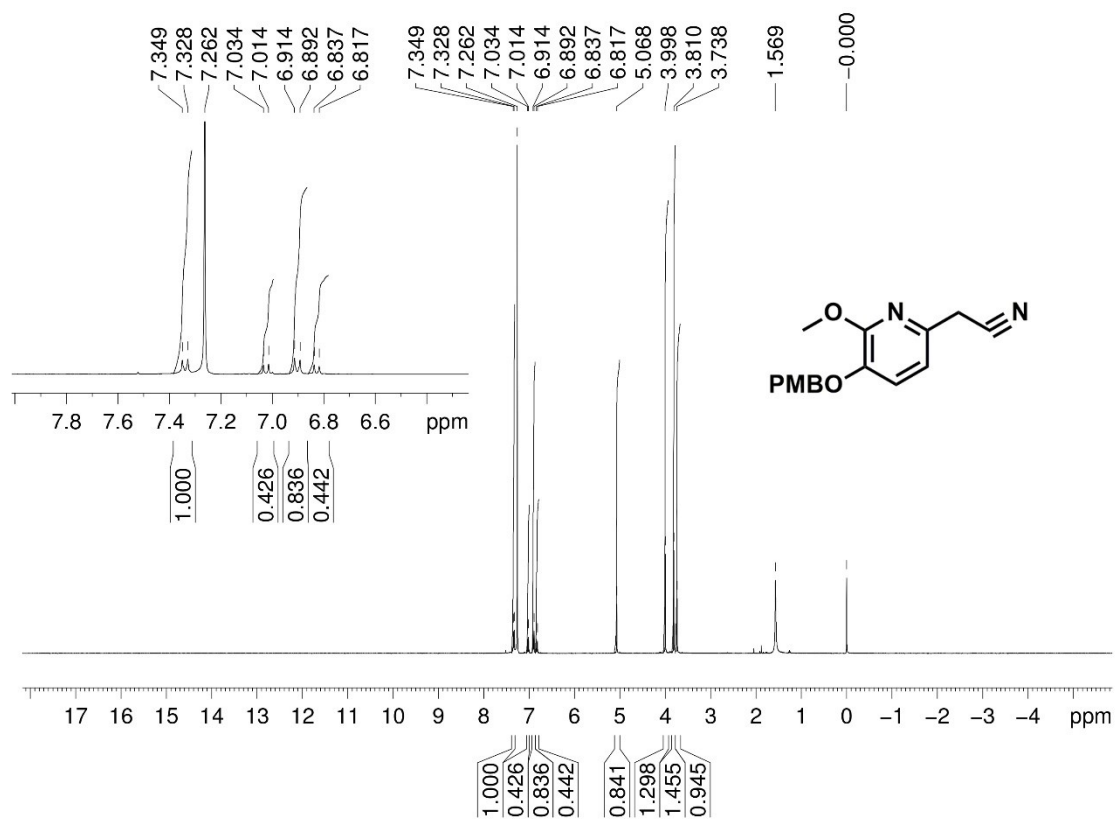

<sup>1</sup>H NMR spectrum of compound 4 in CDCl<sub>3</sub>

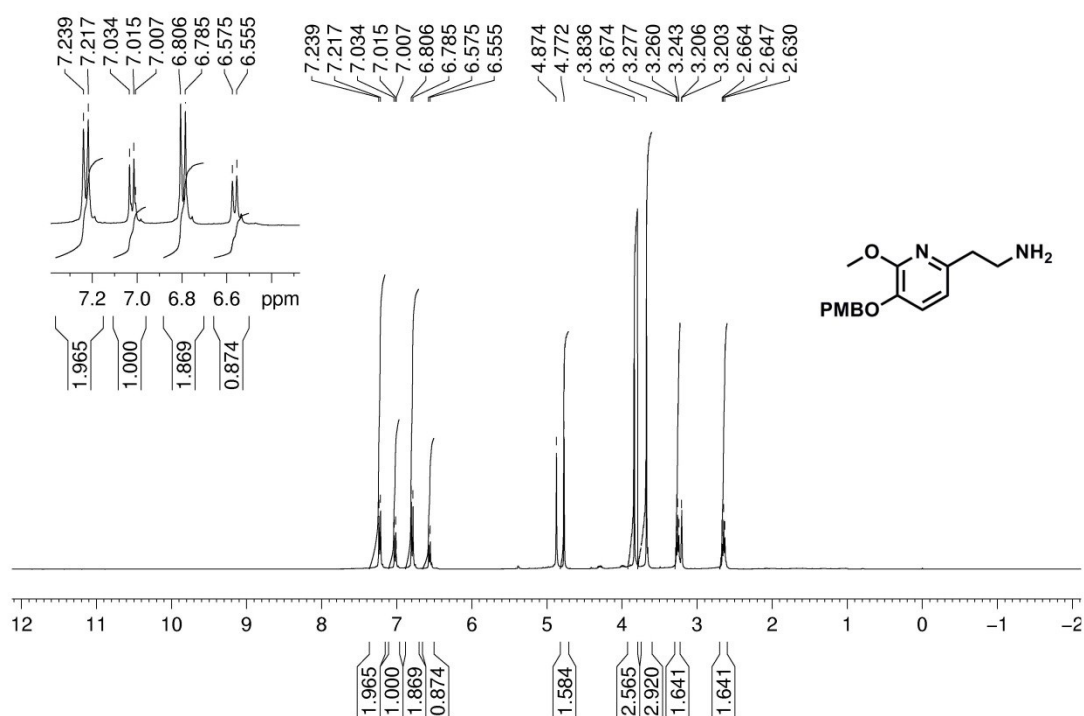

<sup>1</sup>H NMR spectrum of compound 5 in CD<sub>3</sub>OD

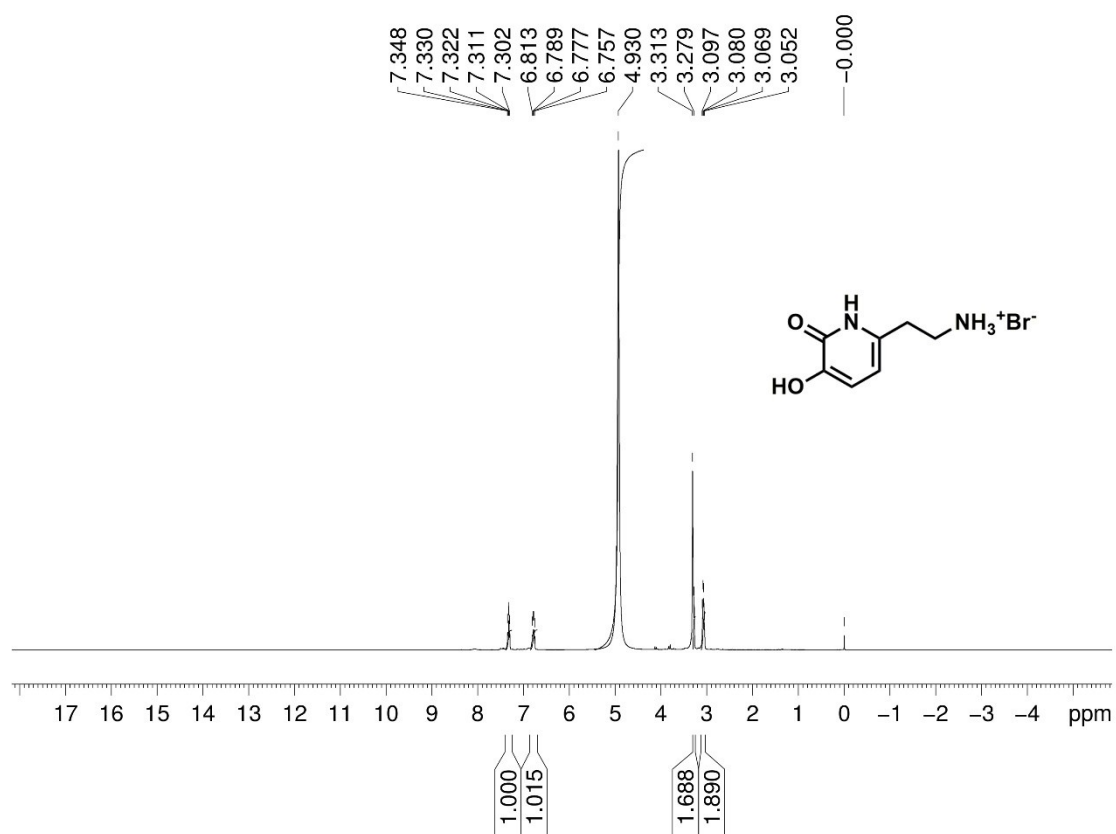

$^1\text{H}$  NMR spectrum of compound 6 in  $\text{CD}_3\text{OD}$

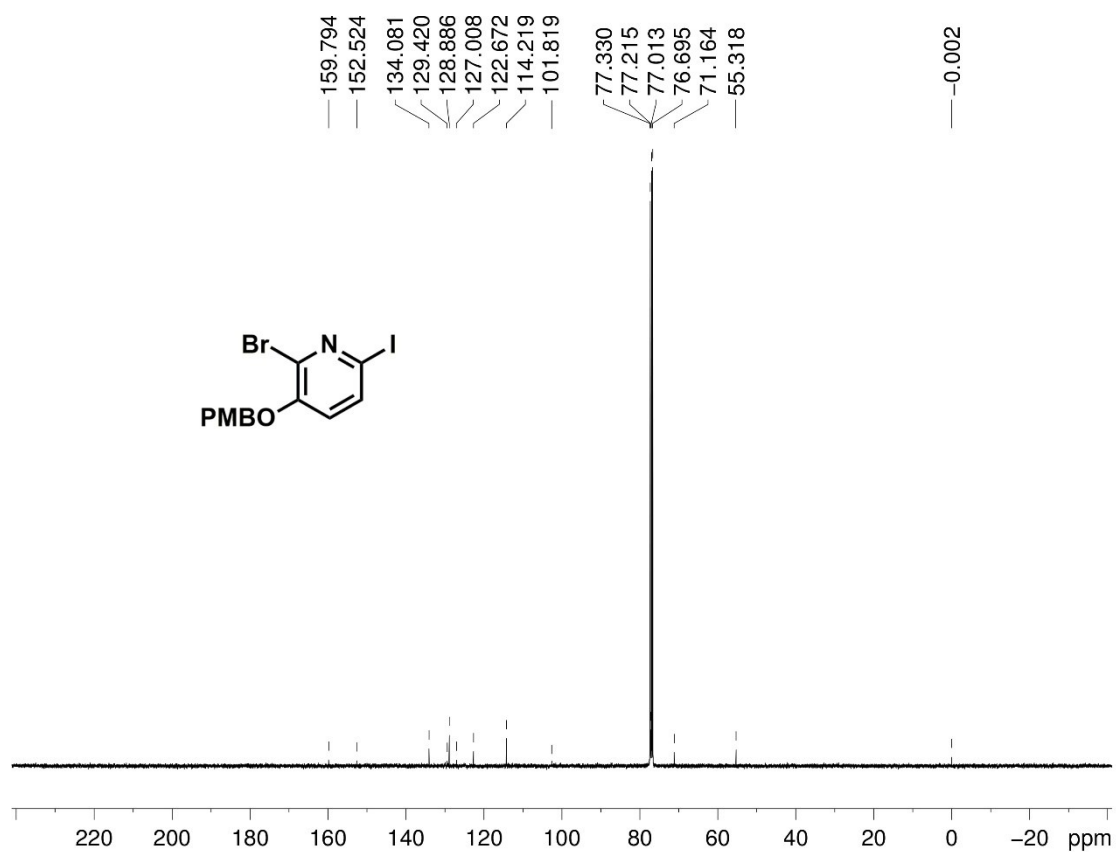

<sup>13</sup>C NMR spectrum of compound 2 in CDCl<sub>3</sub>

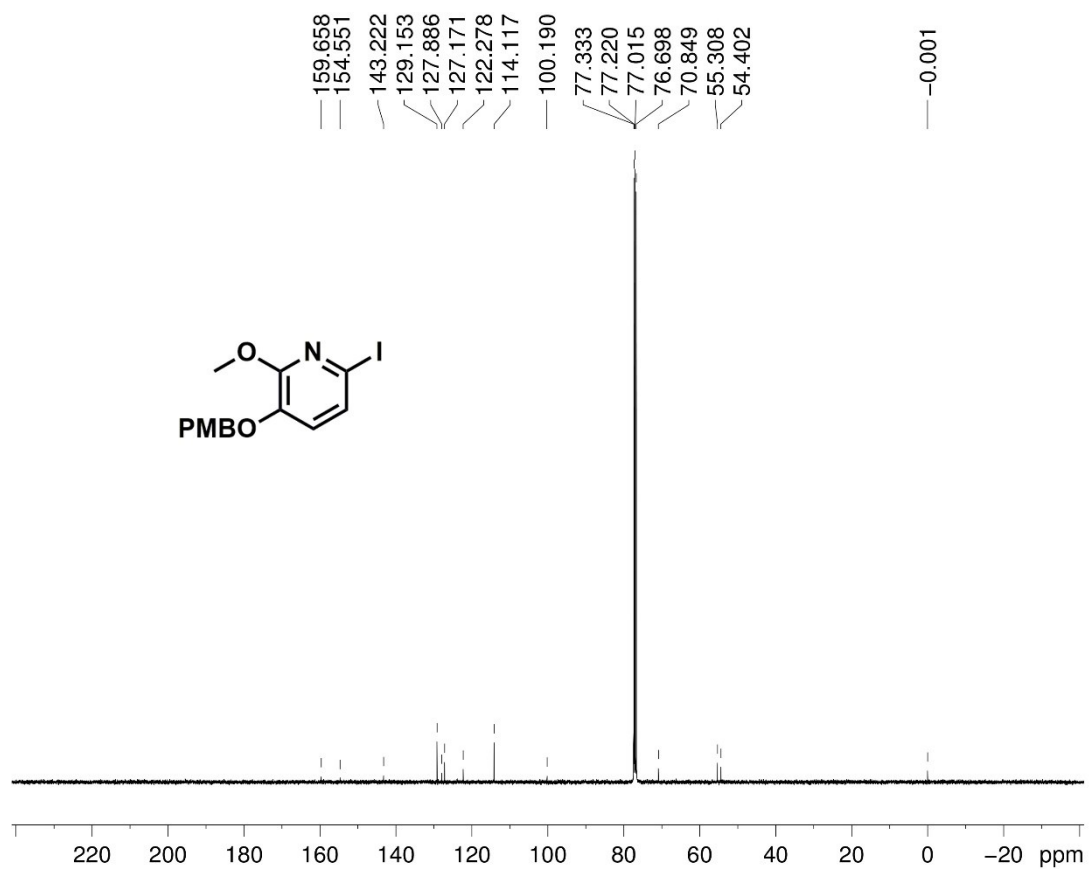

<sup>13</sup>C NMR spectrum of compound 3 in CDCl<sub>3</sub>

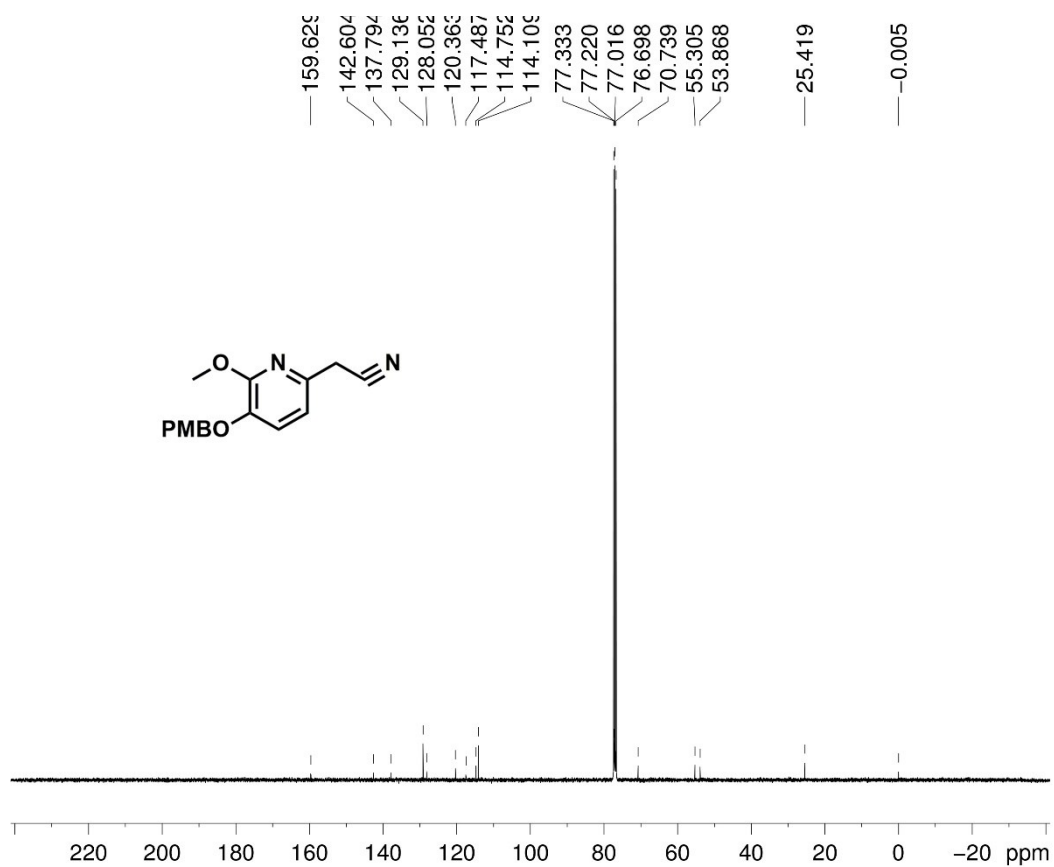

$^{13}\text{C}$  NMR spectrum of compound 4 in  $\text{CDCl}_3$

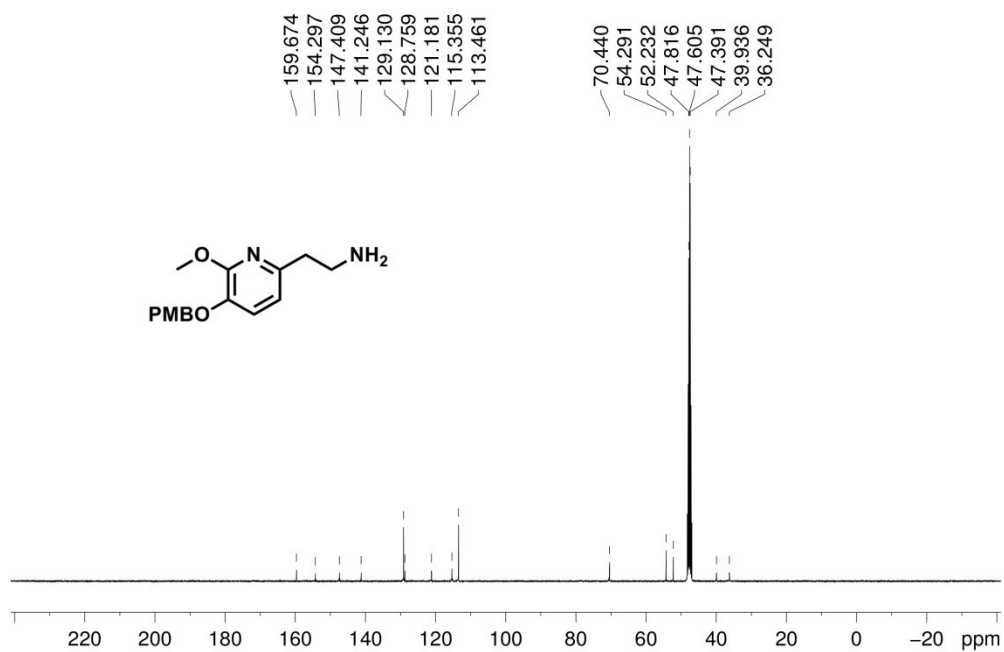

<sup>13</sup>C NMR spectrum of compound 5 in CD<sub>3</sub>OD



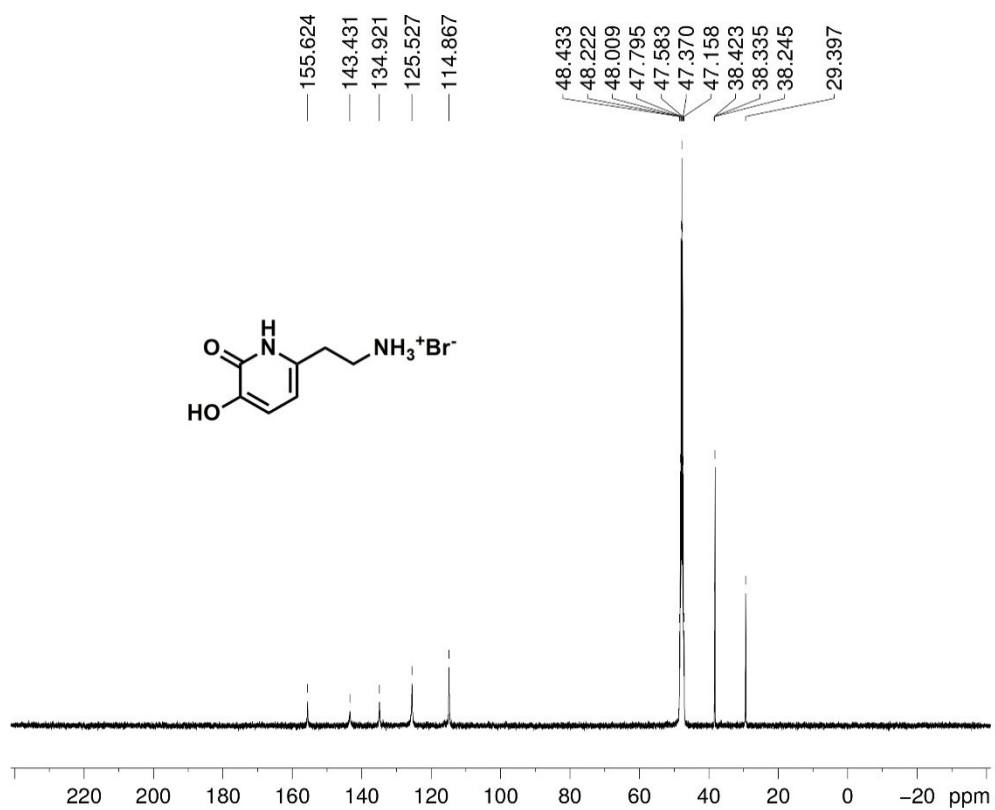

$^{13}\text{C}$  NMR spectrum of compound 6 in  $\text{CD}_3\text{OD}$

### 3. Supplementary Figures

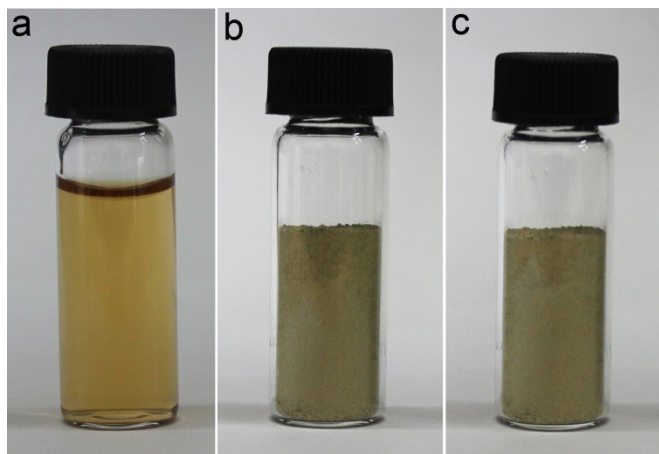

**Figure S1.** (a) Photograph of the hydrobromide of AHPO solution. (b,c) Photographs of the hydrobromide of AHPO powder (b) before and (c) after keeping in air for three months.

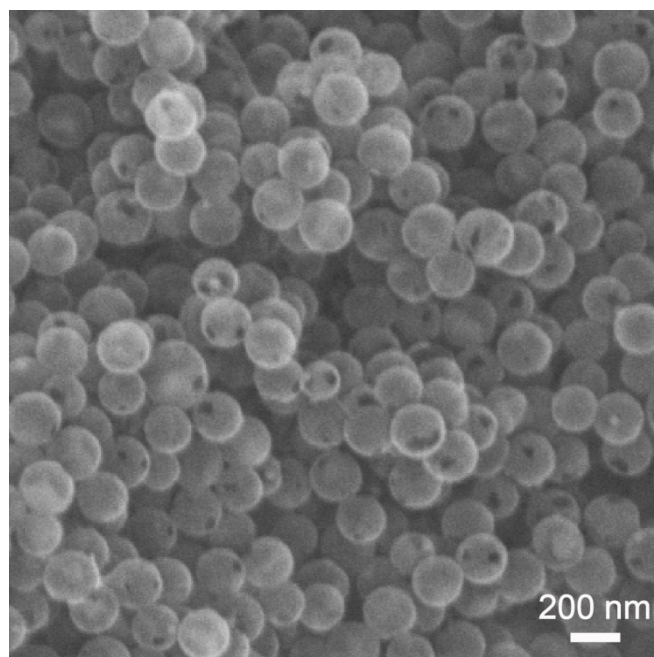

**Figure S2.** SEM image of PAP-NCNCs.

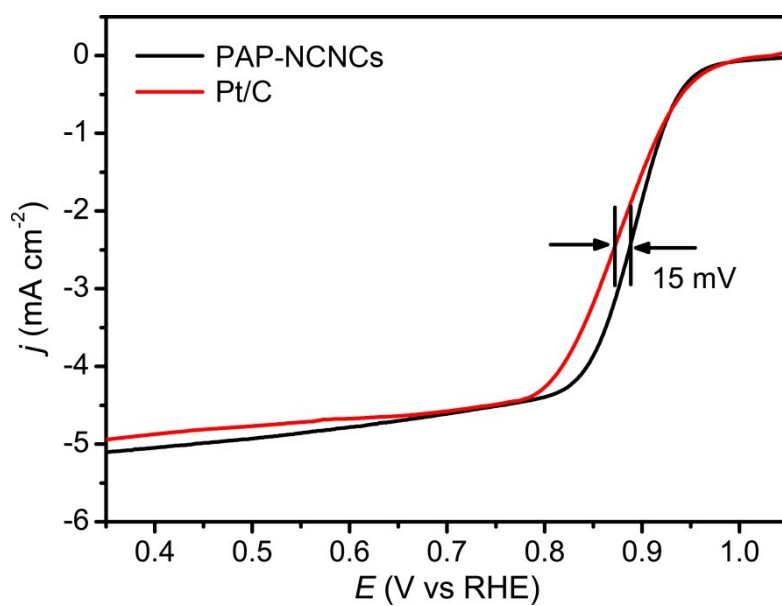

**Figure S3.** LSV curves of PAP-NCNCs and commercial Pt/C catalyst at 1600 r.p.m. in O<sub>2</sub>-saturated 0.1 M KOH solution.

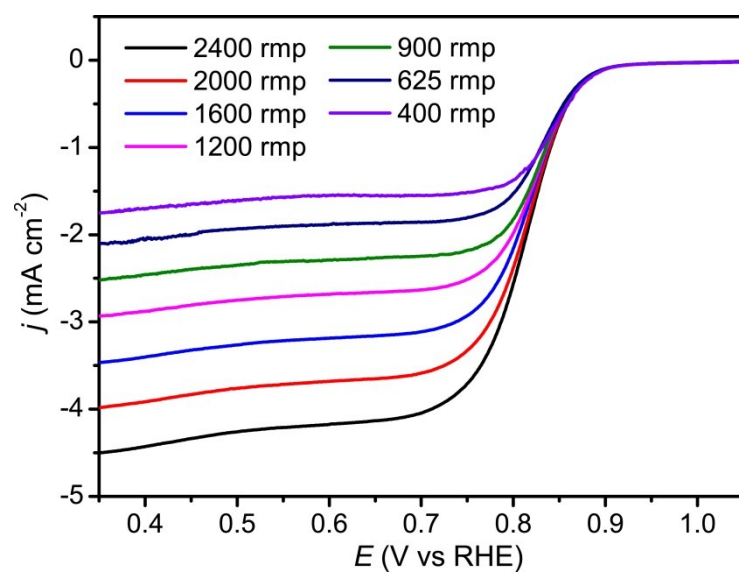

**Figure S4.** LSV curves of PDA-NCNCs in O<sub>2</sub>-saturated 0.1 M KOH with different rotating speeds.

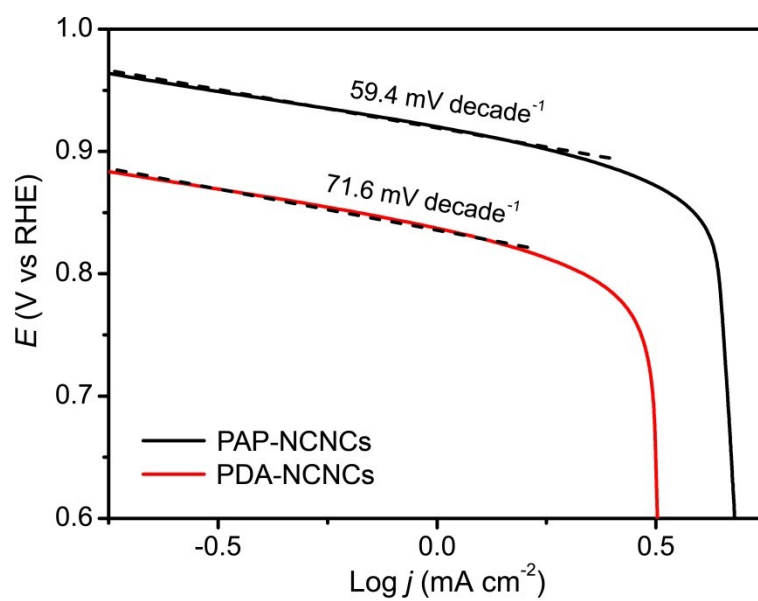

**Figure S5.** The Tafel plots of PAP-NCNCs and PDA-NCNCs catalysts.

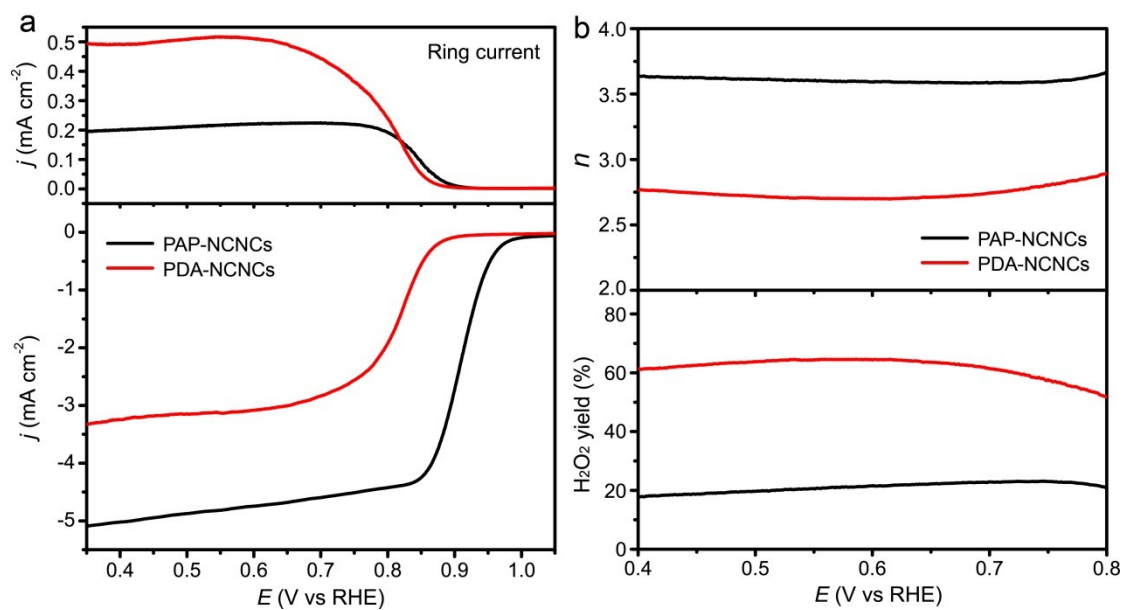

**Figure S6.** (a) RRDE tests (1600 rpm) of PAP-NCNCs and PDA-NCNCs catalysts for ORR in 0.1 M KOH saturated with O<sub>2</sub>. (b) The calculated electron transfer number and H<sub>2</sub>O<sub>2</sub> generated from ORR.

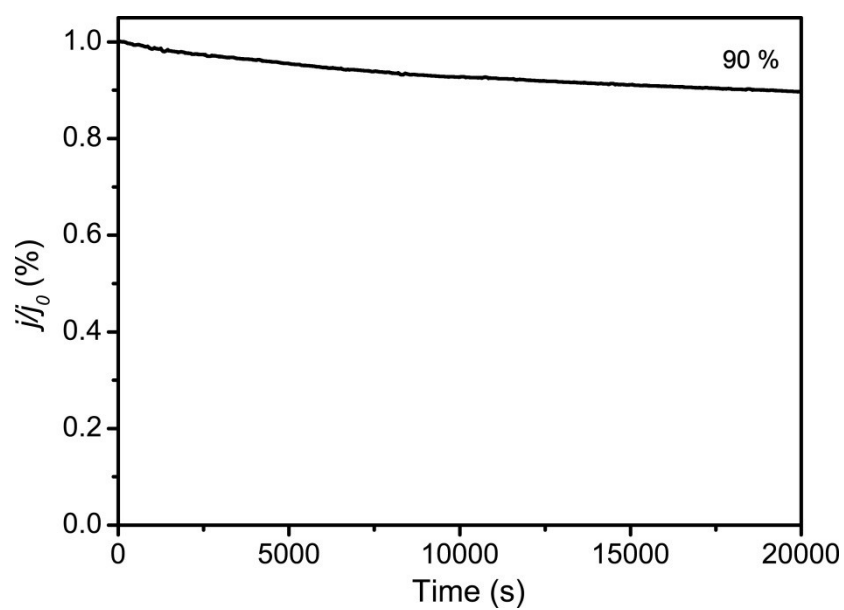

**Figure S7.** The chronoamperometric response of PDA-NCNCs in O<sub>2</sub>-saturated 0.1 M KOH solution at 0.8 V at 1600 rpm.



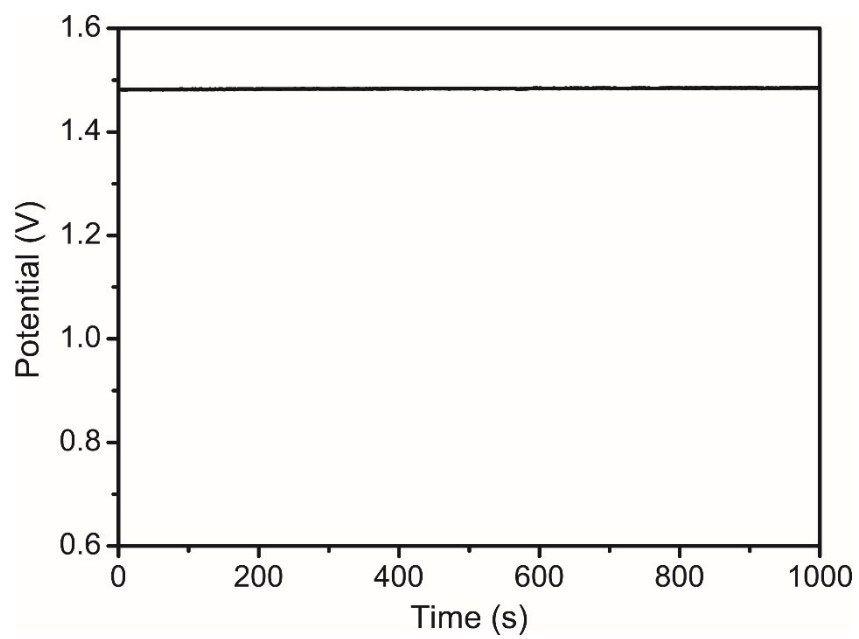

**Figure S8.** Open circuit voltage measurement of primary Zn–air battery with PAP-NCNCs as the cathode catalyst.

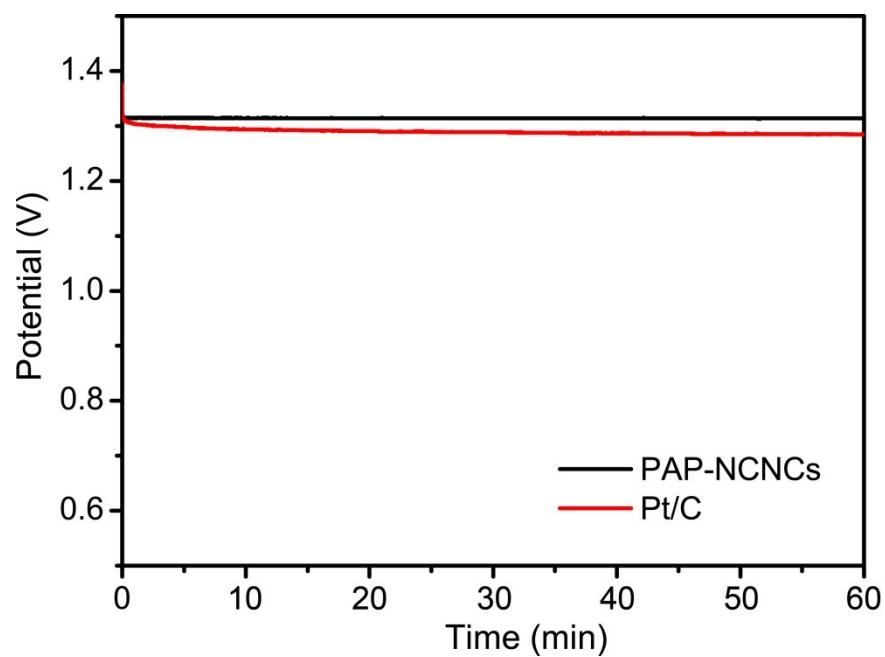

**Figure S9.** Typical galvanostatic discharge curves of primary Zn–air batteries with PAP-NCNCs and Pt/C as cathode catalysts at a current density of  $5 \text{ mA cm}^{-2}$ .

## 4. Supplementary Table

**Table S1.** ORR parameters of typical comparable samples.

| Catalyst                                                | Loading<br>(mg/cm <sup>2</sup> ) | Onset<br>potential<br>(V) | Current density<br>at 0.8V<br>(mA/cm <sup>2</sup> ) | Half-wave<br>potential<br>(E <sub>1/2</sub> , V) | Reference                                    |
|---------------------------------------------------------|----------------------------------|---------------------------|-----------------------------------------------------|--------------------------------------------------|----------------------------------------------|
| N-doped carbon<br>nanosheets                            | 0.6                              | 0.95                      | 3.2                                                 | 0.84                                             | Angew. Chem. Int. Ed.<br>2014, 53, 1570      |
| Mesoporous N-doped<br>carbon                            | 0.8                              | 0.93                      | 2.8                                                 | 0.82                                             | J. Am. Chem. Soc. 2011,<br>133, 206          |
| N-doped hierarchically<br>porous carbons                | 0.5                              | 0.98                      | 4.9                                                 | 0.87                                             | Nat. Commun. 2014, 5,<br>4973                |
| N-doped mesoporous<br>carbon spheres                    | 0.71                             | 0.90                      | 0.5                                                 | 0.74                                             | Angew. Chem. Int. Ed.<br>2015, 54, 588       |
| Carbon nanotubes/<br>heteroatom-doped carbon            | 0.6                              | 0.93                      | 3.4                                                 | 0.81                                             | Angew. Chem. Int. Ed.<br>2014, 53, 4102      |
| N and P co-doped<br>mesoporous<br>nanocarbon foams      | 0.5                              | 0.94                      | 3.4                                                 | 0.85                                             | Nat. Nanotechnol. 2015,<br>10, 444           |
| N and S co-doped<br>Carbon                              | unknown                          | 0.91                      | 2.1                                                 | 0.76                                             | ACS Appl. Mater.<br>Interfaces 2015, 7, 7214 |
| N and B co-doped<br>graphene                            | 0.283                            | 0.87                      | 3.7                                                 | 0.84                                             | Angew. Chem. Int. Ed.<br>2013, 52, 3110      |
| N and F dual-doped<br>mesoporous graphene               | unknown                          | 0.98                      | 3.6                                                 | 0.83                                             | Nanoscale 2015, 7, 10584                     |
| N-doped ordered macro-<br>mesoporous<br>carbon/graphene | 0.42                             | 0.86                      | 0.7                                                 | 0.73                                             | Adv. Mater. 2013, 25, 6226                   |
| Vertically aligned N-<br>doped CNTs                     | unknown                          | 0.97                      | 2.6                                                 | 0.84                                             | Science 2009, 323, 760                       |
| N-CNF aerogel                                           | 0.4                              | 0.97                      | 2.5                                                 | 0.80                                             | Nano Energy 2015, 11, 366                    |
| <b>Pt/C (20 %)</b>                                      | <b>0.2</b>                       | <b>0.99</b>               | <b>4.3</b>                                          | <b>0.872</b>                                     | <b>This work</b>                             |
| <b>PAP-NCNCs</b>                                        | <b>0.2</b>                       | <b>0.98</b>               | <b>4.4</b>                                          | <b>0.887</b>                                     | <b>This work</b>                             |

Note: The N contents for all samples in this table range from 2.0 at. % to 9.4 at. %.

**Table S2.** The performance of primary Zn-air batteries with various electrocatalysts.

| Catalyst                                           | Loading<br>(mg cm <sup>-2</sup> ) | Peak power<br>density<br>(mA cm <sup>-2</sup> ) | Specific capacity<br>(mAh g <sub>Zn</sub> <sup>-1</sup> ) | Reference                                |
|----------------------------------------------------|-----------------------------------|-------------------------------------------------|-----------------------------------------------------------|------------------------------------------|
| Porous N doped<br>graphene                         | -                                 | 70                                              | 400                                                       | J. Mater. Chem. 2012,<br>22, 12810       |
| CoO/N-CNT                                          | 1.0                               | 265                                             | 570                                                       | Nat. Commun. 2013, 4,<br>1805            |
| N doped graphene                                   | 0.7                               | 42                                              | -                                                         | J. Electrochem. Soc.<br>2013, 160, F910. |
| MnO <sub>2</sub> /Co <sub>3</sub> O <sub>4</sub>   | 2.0                               | 36                                              | -                                                         | Nanoscale 2013, 5, 4657                  |
| N-doped<br>hierarchically porous<br>carbons        | 1.0                               | -                                               | 630                                                       | Nat. Commun. 2014, 5,<br>4973            |
| Nitrogen-doped<br>carbon nanofiber                 | 1.0                               | -                                               | 615                                                       | Nano Energy 2015, 11,<br>366             |
| N and P co-doped<br>mesoporous<br>nanocarbon foams | 0.5                               | 55                                              | 735                                                       | Nat. Nanotechnol. 2015,<br>10, 444       |
| Cu-Pt nanocage                                     | 2.0                               | -                                               | 560                                                       | ACS Catal. 2015, 5,<br>1445              |
| Nanoporous carbon<br>nanofiber films               | 2.0                               | 185                                             | 626                                                       | Adv. Mater. 2016, 28,<br>3000            |
| <b>PAP-NCNCs</b>                                   | <b>0.5</b>                        | <b>96</b>                                       | <b>728</b>                                                | <b>This work</b>                         |

### Supplementary References

[S1] A. C. J. Heinrich, B. Thiedemann, P. J. Gates and A. Staubitz, *Org. Lett.*, 2013, **15**, 4666.

[S2] W. Stöber and A. E. Bohn, *J. Colloid Interface Sci.*, 1968, **26**, 62.

[S3] J. Zhang, Z. Zhao, Z. Xia and L. Dai, *Nat. Nanotechnol.*, 2015, **10**, 444.
